# Supplementary material
Source: Springer Nature journal article supplement (https://www.springermedizin.de/resource/supplementary/12871_2013_350_MOESM4_ESM.pdf/9429190)

# Opioid prescription (%)

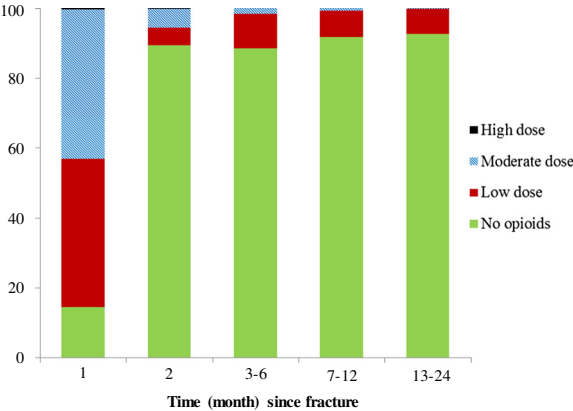

Supplement: MOESM4 [file 9429190]
